# 1 Towns and Trails Drive Carnivore Connectivity using a Step 2 Selection Approach

3  
4 Jesse Whittington, Robin Baron, Mark Hebblewhite, Adam T. Ford, John Paczkowski  
5

## 6 **Affiliations**

- 7 • JW, RB: Park Canada, Banff National Park Resource Conservation. PO Box 900, Banff,  
8 Alberta, Canada. T1L 1K2
- 9 • MH: Wildlife Biology Program, Department of Ecosystem and Conservation Sciences,  
10 W.A. Franke College of Forestry and Conservation, University of Montana, 32 Campus  
11 Drive, Missoula, MT, USA.59801
- 12 • AF: Department of Biology, Faculty of Science, University of British Columbia,  
13 Kelowna, BC, Canada. V1V 1V7
- 14 • JP: Alberta Environment and Parks, Kananaskis Region, 201, 800 Railway Avenue,  
15 Canmore, Alberta, Canada. T1W 1P1

## 16 17 **Abstract**

18 Global increases in human activity threaten connectivity of animal populations. Protection and  
19 restoration of animal movement corridors requires robust models to forecast the effects of human  
20 activity on connectivity. Recent advances in the field of animal movement ecology and step  
21 selection functions offer new approaches for estimating connectivity. We show how a

22 combination of hidden Markov movement models and step selection functions can be used to  
23 simulate realistic movement paths with multiple behavioral states. Simulated paths can be used  
24 to generate utilization distributions and estimate changes in connectivity for multiple land use  
25 scenarios. We applied movement models to 20 years of grizzly bear (*Ursus arctos*) and gray wolf  
26 (*Canis lupus*) data collected in and around Banff National Park, Canada. These carnivores  
27 avoided areas near towns in all seasons, avoided areas of high trail density in most seasons, and  
28 campgrounds during summer and fall. We simulated movement paths for three landscape  
29 scenarios: reference conditions with no anthropogenic development, current conditions, and  
30 future conditions with expanded town footprints and trail networks. We counted the number of  
31 paths that crossed valley-wide, digital transects through mountain tourist towns of Banff and  
32 Canmore, Alberta. We divided current and future crossing rates by the reference crossing rates to  
33 estimate connectivity. Current connectivity rates ranged between 7 and 45% of reference values  
34 with an average of 21% for grizzly bears and 25% for wolves. Potential town expansion and  
35 increased development of trails further decreased connectivity an average of 6% in future  
36 scenarios. Anthropogenic developments reduced the amount of available high quality large  
37 carnivore habitat in the Bow Valley by an average of 14% under current conditions and 16%  
38 under future conditions. Our approach for estimating connectivity provides a robust and flexible  
39 method for combining movement models with step selection analyses to estimate connectivity  
40 for a variety of species.

41

## 42 **Key words**

43 connectivity, conservation, corridors, movement ecology, human development, resource  
44 selection, step selection, utilization distribution

## 45 **Introduction**

46 Global increases in human activity threatens wildlife populations and as a result, many  
47 conservation programs have increased their focus on ecological connectivity (Hilty et al. 2020).  
48 Connectivity analyses of animal movement are frequently used to identify likely dispersal routes  
49 between populations (Fattebert et al. 2015, Zeller et al. 2018), seasonal migrations routes (e.g.  
50 Fullman et al. 2021), and to highlight natural and anthropogenic pinch points to movement (i.e.  
51 wildlife corridors) as priority areas for conservation (Chetkiewicz and Boyce 2009, Suraci et al.  
52 2020). Within an animal's home range, wildlife corridors facilitate movements important for  
53 reproduction, accessing seasonal resources, and predator-prey processes (Hebblewhite 2005,  
54 Panzacchi et al. 2016). At broader scales, connectivity facilitates dispersal (Benz et al. 2016),  
55 gene flow, and demographic rescue of subpopulations (Marrotte et al. 2017, Lamb et al. 2020). A  
56 wide variety of approaches have been used to estimate connectivity of animal movements, with  
57 varying degrees of success (Calabrese and Fagan 2004, Zeller et al. 2018). Emerging techniques  
58 in the field of movement ecology offer new opportunities to develop stronger links between  
59 movement behavior and estimates of connectivity (e.g. Hooten et al. 2020).

60 Movement models and step selection analyses offer a complementary approach for  
61 estimating connectivity either from model predictions (Buderman et al. 2018, Hooten et al. 2020)  
62 or from simulated paths (Palmer et al. 2011, Quaglietta and Porto 2019, Zeller et al. 2020). Step  
63 selection analyses are a subset of spatial point-process models that are increasingly used to  
64 estimate relative selection of resources (Fortin et al. 2005), to understand the effects of human  
65 activity on animal movement behaviour (e.g. Suraci et al. 2019), and to create utilization  
66 distributions (UDs) that predict spatial variation in intensity of habitat use (Signer et al. 2017).  
67 Step selection analyses have become increasingly accessible for practitioners through the

68 development of statistical packages in R (Avgar et al. 2016, Signer et al. 2019, Muff et al. 2020).  
69 Several studies have incorporated step selection functions (SSFs) into connectivity analyses by  
70 first creating spatial predictions of habitat use and then transforming predictions into resistance  
71 layers for cost-distance or circuit theory analyses (Zeller et al. 2018, Brennan et al. 2020, Suraci  
72 et al. 2020). Others have used the derived resistance surfaces to simulate animal movements  
73 (Quaglietta and Porto 2019, Jayadevan et al. 2020, Zeller et al. 2020). For example, Merkle et al.  
74 (2019) simulated movements directly from an SSF to forecast migration routes. Simulated  
75 individual-based paths are appealing because they can incorporate sequential, probabilistic  
76 movement decisions related to landscape features, speed of travel, and directional persistence  
77 (Avgar et al. 2016). Moreover, simulating animal movements is considered the best practice for  
78 generate unbiased UD<sub>s</sub> from SSFs (Signer et al. 2017). Simulations, while computational  
79 intensive, can easily be applied to multiple land use scenarios. Movement simulations from SSFs  
80 offer a promising method for assessing the cumulative effects of multiple landscape features on  
81 animal movement paths, intensity of use, and connectivity.

82         Realistic simulations need to accommodate the underlying factors that influence animal  
83 movement including seasonal (Zeller et al. 2019, Brennan et al. 2020, Zeller et al. 2020) and  
84 temporal (Gaynor et al. 2018, Lamb et al. 2020) variability in resource selection and state-  
85 specific movement behaviors (Michelot et al. 2016). For example, animals often have low  
86 directional persistence and low speed of travel when feeding and resting in slow states and have  
87 strong directional persistence and higher speed of travel when travelling in fast states (Fryxell et  
88 al. 2008). Such behavioral states are overlooked in classical circuit theory and cost-distance type  
89 connectivity models. And failure to incorporate behavioral state into SSFs can lead to biased  
90 UD<sub>s</sub>, poor estimates of connectivity, and misidentification of wildlife corridors (Abrahms et al.

91 2017). Finally, responses to human activity and estimates of connectivity can vary widely among  
92 species (e.g. Rogala et al. 2011, Brennan et al. 2020, Nickel et al. 2020). From a conservation  
93 perspective, focussing on the most sensitive species should increase connectivity for most other  
94 wildlife (Meurant et al. 2018, Lamb et al. 2020).

95         Large carnivores are an important consideration for landscape-scale measures of  
96 connectivity for a number of reasons. First, these iconic and charismatic species are often  
97 selected as conservation ‘flagship’ and umbrella species, meaning they hold a particularly deep  
98 value for the public and management agencies (Ray et al. 2013). Second, the potential threat of  
99 carnivores to human safety requires a detailed understanding of how animals move through  
100 human-dominated landscapes (Buchholtz et al. 2020, Lamb et al. 2020). Third, large carnivores  
101 have the potential to affect community-level processes through top-down control on prey  
102 abundance and thus trophic cascades (Hebblewhite et al. 2005, Hebblewhite and Merrill 2011,  
103 Ripple et al. 2014). Consequently, understanding how movements of carnivores are affected by  
104 connectivity and corridor design policies (Ford et al. 2020) is an important step towards better  
105 management of ecosystem-level process (Terborgh et al. 1999).

106         The novel approaches to quantifying connectivity afforded through SSF-derived  
107 simulations may support better land use decision making for carnivore conservation. Here, we  
108 focused on assessing carnivore connectivity in a transboundary region of Banff National Park  
109 (BNP), AB, Canada where transportation infrastructure, outdoor recreation, and urban areas  
110 occupy much of the prime habitat in the valley bottoms of the mountainous landscape. We focus  
111 on the movements of grizzly bears (*Ursus arctos*) and wolves (*Canis lupus*) because of their  
112 management relevance, threatened status, and important ecological roles (e.g. Hebblewhite et al.  
113 2005). We used 20 years of grizzly bear and wolf telemetry data to develop seasonal hidden

114 Markov models and SSFs. We simulated animal paths from the movement models and SSFs to  
115 assess changes in UDs and connectivity. Based on grizzly bear and wolf responses to human  
116 activity in other studies (Whittington et al. 2005, Hebblewhite and Merrill 2008, Lamb et al.  
117 2020), we expected grizzly bears and wolves to select linear features as efficient travel routes  
118 while avoiding areas near towns and areas with high trail density. We expected avoidance to be  
119 most pronounced and connectivity to be lowest during peak tourist visitation in summer. Finally,  
120 we expected that connectivity around towns would decrease from current to future conditions  
121 due to an expanded town footprint and increased recreational trail density (Gutzwiller et al.  
122 2017). Building on the growing field of movement ecology, we provide a flexible approach to  
123 generate movement-based estimates of connectivity that can be applied to other taxa and  
124 systems.

125

## 126 **Materials and Methods**

### 127 **Study area**

128 The study area encompassed 17,450 km<sup>2</sup> of the Canadian Rockies within and adjacent to BNP  
129 (51.2° N, 115.5° W, Appendix S1: Figure S1). We defined the extent of the study area based on  
130 movements of radio-collared wolves and grizzly bears monitored from 2000 to 2020. The study  
131 area contained rugged topography, short summers and long cold winters. See Whittington et al.  
132 (2019) for a description of vegetation and the predator-prey community.

133 The study area contained the tourist towns of Banff and Canmore and several hamlets  
134 that occupied the centre of the Bow Valley. Linear features such as the Trans Canada highway, a  
135 national railway, and secondary roads bisected the study area. Like many global protected areas  
136 (Wittemyer et al. 2008), human activity within the study area increased steadily over the last 20

137 years (Alberta Environment and Parks 2018), with the potential for increasing impacts on  
138 wildlife connectivity (Gutzwiller et al. 2017). BNP currently receives over 4 million visitors per  
139 year, mostly concentrated in summer. Most anthropogenic developments and recreational  
140 activities were concentrated near roads within the Bow Valley. Backcountry areas in the  
141 northeastern portion of the study area received minimal human use.

## 142 **Telemetry data**

143         Researchers fit wolves and grizzly bears with Global Positioning System (GPS) collars to  
144 collect data from 2000 to 2020. Researchers captured and collared grizzly bears using a  
145 combination of culvert traps and free-range darting and wolves using a net shot from a helicopter  
146 under University and Federal government capture and Animal Care permits (see Appendix S1  
147 for summary of permits). Researchers programmed most collars to collect GPS locations every  
148 two hours. GPS collars had high fix rates with low habitat-induced fix-rate bias (Hebblewhite et  
149 al. 2007). We obtained a large sample of locations from both front and backcountry areas (Figure  
150 2, Appendix S1: Figures S1 – S3).

## 151 **Statistical analyses**

152         We used a three stage, individual-based modeling approach to quantify carnivore  
153 responses to anthropogenic features and connectivity (Figure 1). Here, we provide an overview  
154 of our methods and then provide additional details for each step of the analysis. First, we applied  
155 hidden Markov models to animal movement data to predict slow versus fast movement states as  
156 well as movement parameters and transition probabilities for both movement states. We  
157 associated slow states with feeding or resting behaviour, and fast states with travelling  
158 behaviour. Second, we integrated movement states into SSFs, such that each SSF contained  
159 interactions between movement state, directional persistence, and movement rates. This enabled

160 us to simulate state-specific movements directly from our SSF. We used results of the SSF to  
161 assess responses to anthropogenic features. We also developed home-range scale resource  
162 selection function (RSF) models to evaluate scale-dependence of SSF models for connectivity  
163 evaluation. Third, we used the combination of hidden Markov models and SSFs with covariates  
164 to simulate realistic individual-based movements. We simulated movement paths under three  
165 landscape conditions reflecting reference, current, and future levels of anthropogenic  
166 development. Reference represented a null model of potential habitat with no anthropogenic  
167 development. We compared transect crossing rates and UDs from current and future conditions  
168 to reference conditions to estimate connectivity and change in the amount of high-quality habitat  
169 for each carnivore.

### 170 *Movement model*

171 We fit hidden Markov models to grizzly bear and wolf GPS step lengths and turn angles  
172 so that we could incorporate movement behaviour into SSFs and to create biologically realistic  
173 simulations of animal movement. We used functions from the *moveHMM* package version 1.7 to  
174 fit hidden Markov models (Michelot et al. 2016). For each species and season, we fit two-state  
175 movement models to reflect slow and fast movements, following previous studies of GPS  
176 movement (Fryxell et al. 2008). We used the gamma distribution for step length and the circular  
177 von Mises distribution for turn angles (Avgar et al. 2016). We included the cosine of hour as a  
178 covariate to allow for diurnal variation in the frequency of slow and fast states. We predicted the  
179 probability of being in a fast state for each GPS location, which we then incorporated into the  
180 SSF below (Figure 1). We further used parameters from the movement models to simulate  
181 movement states, step lengths, and turn angles in the path simulations below.

182



183 *Step and resource selection: responses to development across scales*

184 We developed grizzly bear and wolf SSF and RSF to assess how anthropogenic  
185 development, topography, and land cover affected seasonal wolf and grizzly bear movement  
186 (Figure 1). One of the challenges of interpreting SSFs is that results can depend on sampling  
187 scale, i.e., time between locations (Mahoney et al. 2018). To ensure results of our SSF-based  
188 movement models were consistent with third-order within home range processes, we developed  
189 complementary RSF models for individual wolf and grizzly bears to evaluate potential scale-  
190 dependence in SSF results.

191 The SSF models compared movement and environmental attributes of used steps to  
192 matched available locations (Avgar et al. 2016, Signer et al. 2019). We estimated each animal's  
193 movement parameters for step length and turn angle. We sampled from these movement  
194 parameters to generate random locations around each used location to sample availability. For  
195 each animal's step (strata  $i$ ) we generated  $J = 10$  paired random locations. We extracted covariate  
196 vectors  $\mathbf{x}_{ij}$  for each location and used conditional logistic regression to estimate covariate vector  
197  $\beta$ .

198 (eq. 1)

199 
$$Pr(y_{ij} = 1 | \mathbf{x}_{ij}) = \pi_{ij} = \frac{\exp(\beta \mathbf{x}_{ij})}{\sum_{j=1}^J \exp(\beta \mathbf{x}_{ij})}$$

200 We followed the modelling strategies outlined by Muff et al. (2020) for used-available  
201 SSF and RSF designs. We used the Poisson formulation of conditional logistic regression to fit  
202 the SSF and included random intercepts for each strata  $i$ . We accounted for individual animal  
203 variability in selection by including random coefficients for explanatory variables. We set  
204 weights for used locations to 1.0 and random locations to 1000, and fixed the variance of the

205 random intercept for strata to  $10^4$ . We used the R packages amt version 0.0.9 (Signer et al. 2019)  
206 to define available locations and glmmTMB version 1.0.1 (Brooks et al. 2017) to estimate the  
207 models. We visualized the effects of covariates on the relative probability of selection using  
208 relative selection strength (RSS) where  $RSS = \exp(\beta x)$  (Avgar et al. 2017).

209 The SSFs included covariates for state-specific speed of travel and directional persistence  
210 (Roever et al. 2014, Duchesne et al. 2015). We first predicted the probability of fast state for  
211 each used location from the hidden Markov model (section 2.3.1 above, Figure 1). We applied  
212 that predicted probability to all paired available locations. Our SSF then included interactions  
213 between probability of fast state and the natural logarithm of step length and between probability  
214 of fast state and the cosine of turn angle (Avgar et al. 2016). Thus, selection for step lengths  
215 (speed) and turn angles (persistence) depended on movement state. The cosine of turn angle  
216 reflected a measure of directional persistence with values ranging between -1.0 when animals  
217 turned around to 1.0 when they continued in the same direction.

218 We developed RSF models with a ratio of 1:10 used to available locations and sampled  
219 available locations within each individual animal's 95% minimum convex polygon. We used  
220 logistic regression to fit the RSF and included random intercepts for each animal. We accounted  
221 for individual animal variability in selection by including random coefficients for explanatory  
222 variables. We set weights for used locations to 1.0 and random locations to 1000, and fixed the  
223 variance of the random intercept for strata to  $10^4$ . We used the R packages amt version 0.0.9  
224 (Signer et al. 2019) to define available locations and glmmTMB version 1.0.1 (Brooks et al.  
225 2017) to estimate the models. We used the same explanatory variables for both SSF and RSF  
226 models. We visually compared parameter estimates for the SSF and RSF models for consistency  
227 in responses to anthropogenic development.

228           The SSFs and RSFs included environmental and anthropogenic explanatory variables that  
229 were previously found to be important predictors of grizzly bear or wolf resource selection in the  
230 Canadian Rockies (Nielsen et al. 2006, Hebblewhite and Merrill 2008, Rogala et al. 2011). To  
231 minimize collinearity, we removed explanatory variables that had Pearson correlation  
232 coefficients  $> 0.6$  and variance inflation factors  $> 2.0$ . When two variables were highly  
233 correlated, we selected the covariate based on biological relevance and predictive power that we  
234 assessed with univariate plots. All models contained the same 17 environmental and  
235 anthropogenic covariates. Environmental covariates included five land cover classes, elevation  
236 (m), the negative cosine of aspect such that south = 1.0 and north = -1.0, slope (degrees),  
237 proximity to forest edge (km), proximity to large patch of vegetated habitat greater than 9 km<sup>2</sup>  
238 (Proctor et al. 2015), and an indicator variable for whether the area had burned since 1960. See  
239 Appendix S1: Table S2 for details.

240           Covariates for anthropogenic development included proximity to towns (km), proximity  
241 to campgrounds (km), density of formal trails (km/km<sup>2</sup>, 500 m radius), and indicator variables  
242 for whether the animal was on or off trails and the railway. We classified distance to town based  
243 on a digitized aerial photograph of buildings and developed areas within towns. We excluded  
244 green spaces and golf courses from the town footprint. We predicted that carnivores would select  
245 for trails and the railway as travel routes. We predicted that carnivores would avoid areas near  
246 towns, campgrounds, and areas of high trail density, especially in summer during peak visitation  
247 (Rogala et al. 2011). We lacked direct measures of human activity so we included an interaction  
248 between trail density and the natural logarithm of distance to paved road (km). We assumed that  
249 trail use would be highest near trail heads along paved roads (Rogala et al. 2011, Zhai et al.  
250 2018). We included an interaction between proximity to town and time of day (cosine of hour)

251 because we expected stronger avoidance of towns during the day compared to the night  
252 (Hebblewhite and Merrill 2008). We applied a decay term ( $1 - \exp^{-10 * \text{distance}}$ ) to the distance  
253 covariates so that the influence of these features had an asymptote near 500 m (Shepherd and  
254 Whittington 2006, Rogala et al. 2011). We scaled all other continuous covariates by their mean  
255 and standard deviation to improve model convergence.

256 Animal resource selection and responses to anthropogenic development can vary  
257 seasonally. Thus, we defined four seasons and created separate SSF models for each species and  
258 season. We defined seasons based on animal movement, plant phenology, and human visitation  
259 rates to BNP. We classified *Spring* as May and June which included plant emergence, ungulate  
260 parturition, grizzly bear mating, wolf denning, and moderate levels of human activity; *Summer* as  
261 July and August during the height of berry season and peak visitation; and *Fall* as September and  
262 October when plants have senesced and the study area received moderate levels of visitation, and  
263 *Winter* as November through April for wolves with lower levels of visitation in backcountry  
264 areas and high levels of visitation near ski hills and towns.

### 265 *Connectivity and habitat degradation*

266 We simulated individual-based carnivore movements from our SSFs across three  
267 landscape scenarios, from which we estimated connectivity and changes in the amount of high  
268 quality habitat (Figure 1). We used a combination of the hidden Markov models and SSFs to  
269 simulate carnivore movements throughout the study area (Figure 1, Appendix S1: Figure 1). We  
270 simulated 200,000 paths within the 17,000 km<sup>2</sup> study area for each species, season, and landscape  
271 scenario. We selected random start locations and initial directions of travel. For each path, we  
272 sampled  $s = 720$  movement states (steps,  $s$ ) with two-hour fix interval across  $t = 60$  days from the  
273 hidden Markov models. We chose 60 days to match the duration of spring, summer, and fall

274 seasons used in the step selection analyses. For each step, we sampled  $n = 20$  step lengths and  
275 turn angles from the state-specific movement parameters. We extracted environmental attributes  
276 of the proposed locations and used the combination of environmental attributes and movement  
277 parameters to calculate probability of use conditional on the 20 sample locations (equation 1).  
278 We probabilistically selected one of the proposed locations and continued to the next step. We  
279 repeated this process for all steps in the path.

280         The study occurred in a rugged environment where steep, rocky mountain ranges can  
281 influence animal movements. We therefore defined unavailable habitat as barren landscapes with  
282 slopes  $\geq 35$  degrees, which were used by grizzly bears and wolves 1.9 and 0.2% of the time,  
283 respectively. We also classified towns and developed areas as unavailable habitat. To create  
284 realistic movement paths, we reduced the probability of simulated steps jumping across  
285 mountain ranges and towns by sampling four equidistant locations along proposed steps. We  
286 rejected steps if any of those locations occurred in the unavailable habitat. We minimized  
287 boundary effects on spatial predictions of use by terminating paths when  $> 40\%$  of the proposed  
288 steps occurred outside the study area and by setting the study area boundary  $> 30$  km from the  
289 towns of Banff and Canmore. Finally, start locations could occur in poor quality habitat, so we  
290 removed the first twelve ( $t = 1$  day) steps from each path while paths oriented to higher quality  
291 habitat.

292         We simulated animal movements for three scenarios with varying levels of anthropogenic  
293 development: reference, current, and future. First, we removed the effect of towns, roads, and the  
294 railway from SSFs when simulating paths under reference conditions, which we used as a null  
295 model of movement (Heinemeyer et al. 2019, Brennan et al. 2020). In reality, First Nations have  
296 occupied the study area for over 11,000 years (Langemann 2011) and the reference condition

297 underestimated the historical effects of human activity. Second, we simulated animal movements  
298 under current conditions from which we developed our SSFs. Finally, we simulated animal  
299 movements under one future scenario with expanded development and trail density. We  
300 modified the town of Canmore's developed footprint to reflect residential and business  
301 development proposals in the 2020 Smith Creek and Three Sisters area structure plans  
302 (QuantumPlace Developments Ltd. 2020b, a). We excluded green spaces and golf courses from  
303 the developed footprint given that carnivores can use these areas for movement. The developed  
304 footprint for the town of Banff is legally fixed under the National Parks Act and is not expected  
305 to increase. However, like many mountain towns, the creation and intensity of use on informal  
306 trails has increased near Banff and Canmore over the last ten years. We, thus added an inventory  
307 of informal trails to the existing formal trail network and updated metrics of trail density.  
308 Increased use of existing and new recreational trails has the potential to reduce wildlife  
309 connectivity (Gutzwiller et al. 2017). We simulated animal movements with the updated town  
310 and trail layers to estimate future connectivity.

311 To calculate connectivity, we created digital, cross-valley transects through the towns of  
312 Banff and Canmore (Figure 2, Figure 3). We aligned transects so that they crossed the narrowest  
313 movement corridors under current condition, where the combination of rugged topography and  
314 development created pinch points to movement. We counted both the number of simulated paths  
315 and individual steps that crossed transects on the north and south sides of the valley. We used  
316 number of unique paths that crossed the transects as our metric of connectivity to reflect the  
317 population level value of corridors. We calculated connectivity as  $100 * n_{cross} / n_{reference}$ , where  
318  $n_{cross}$  was the number of unique paths that crossed in current or future conditions and  $n_{reference}$  was

319 the number of unique paths that crossed under reference conditions with no anthropogenic  
320 development. We evaluated how connectivity changed with species, seasons, and time period.  
321 Finally, we examined the effects of anthropogenic development on the amount of high  
322 quality habitat available to carnivores. We calculated UDs as the number of simulated locations  
323 that occurred within each 210 x 210 m<sup>2</sup> grid cell and then divided the tallies by the number of  
324 total simulated locations (Signer et al. 2017). We classified reference UDs into three equal area  
325 bins representing low, medium, and high quality habitat. We applied the same break points and  
326 habitat classifications to UDs from the current and future scenarios. We then calculated changes  
327 in the amount of high quality habitat. We focussed our analysis within a five km radius of the  
328 Trans Canada Highway between Banff and Canmore (366 km<sup>2</sup>). The five km radius represented  
329 the 0.99 and 0.95 quantiles of grizzly bear and wolf step lengths, respectively, and the focal  
330 study approximately covered the peak to peak width of the Bow Valley. We calculated the  
331 proportion of high quality habitat degraded due to anthropogenic development relative to  
332 reference conditions (Heinemeyer et al. 2019). For example, our calculation of habitat  
333 degradation under current conditions was  $(AreaHigh_{Reference} - AreaHigh_{Current})/TotalArea$ ,  
334 whereby *AreaHigh* represented the area of high quality habitat and *TotalArea*, represented the  
335 total area of the focal study. Our metric of habitat degradation thus accounted for both decreased  
336 UDs near anthropogenic developments and concurrent increased UDs as simulated animals spent  
337 more time in less developed portions of the landscape. We visually evaluated how habitat  
338 degradation varied with species, seasons, and time period.  
339

## 340 **Results**

### 341 **Movement state**

342 We analysed GPS data from 34 grizzly bears (19 females, 15 males, 72,217 locations) and 33  
343 wolves (13 females, 20 males, 84,434 locations; Appendix S1: Figure S1 – S3). Hidden Markov  
344 models revealed that grizzly bears and wolves spent a similar proportion of time in their fast state  
345 ( $p = 0.64$  and  $0.60$  respectively). Grizzly bears and wolves had the same median step lengths for  
346 slow steps (16 m) (Appendix S2: Table S1). Wolf fast steps (median = 1270 m) were on average  
347 2.5 times longer than grizzly bear fast steps (median = 496 m). Grizzly bears had a much  
348 stronger diurnal cycle of movement states than wolves (Figure 4). Grizzly bears increased their  
349 proportion of time in slow states at night. Wolves had a weaker and sometimes opposite diurnal  
350 cycle. Wolves increased the proportion of time in slow states at night during fall and winter only.  
351 Wolves increased the proportion of time in fast states at night during spring and summer, which  
352 coincided with the longest days of the year.

### 353 **Step and resource selection: responses to development across scales**

354 As expected, we found that wolves and grizzly bears generally avoided areas with high  
355 levels of human activity in all seasons (Figure 5, Figure 6, Supplementary Table S2). Both  
356 species strongly avoided areas near towns (median  $\beta = 1.11$ , range from 0.44 to 2.08) and 95%  
357 CI's excluded zero on 6 of the 7 models (Figure 4). Grizzly bear and wolf responses to areas near  
358 town changed slightly at night, though the effect size was small compared to avoidance of towns  
359 in general. Parameter estimates for distance to town were  $>10$  times larger than parameter  
360 estimates for the distance to town by night time interaction (Figure 5, Figure 6). Grizzly bear  
361 avoidance of towns diminished at night in all seasons (e.g., summer  $\beta = -0.05$ , SE = 0.01). Wolf  
362 response to towns diminished at night during winter ( $\beta = -0.05$ , SE = 0.01), but strengthened



363 during summer ( $\beta = -0.05$ , SE = 0.01), and fall ( $\beta = -0.05$ , SE = 0.01). Grizzly bears and wolves  
364 avoided areas with high trail density near paved roads (median  $\beta = -0.93$ , range from -1.92 to  
365 0.151) with all but one estimate being less than zero and five out of seven models with 95% CI's  
366 that excluded zero. Carnivore responses to trail density tapered with distance to paved roads  
367 (Figure 6). Wolves avoided areas near vehicle accessible campgrounds during summer when  
368 campgrounds were most active (e.g., summer  $\beta = 1.00$ , SE = 0.41). Grizzly bears avoided areas  
369 near campgrounds during the fall but not during the summer berry season nor in the spring.  
370 Grizzly bears and wolves weakly selected trails during all seasons with the strongest selection for  
371 grizzly bears in summer and for wolves in winter. Grizzly bears selected the railway during the  
372 spring and fall and avoided the railway during the summer berry season. Wolves strongly  
373 selected the railway during winter and weakly selected the railway at other times of the year.

374 RSF models had similar parameter estimates compared to SSF models confirming  
375 minimal scale-dependence of our SSF results (Figure 5, Appendix S2: Table S3, Table S4). Most  
376 (84%) of the SSF and RSF anthropogenic parameters had the same positive or negative sign.  
377 Most sign differences occurred for parameters with 95% CI's that overlapped zero. From a  
378 management perspective, the biggest difference in parameter estimates was that the grizzly bear  
379 fall SSF suggested weak avoidance of areas near town ( $\beta = 0.44$ , SE = 0.26), whereas the RSF  
380 suggested grizzly bears selected areas near town ( $\beta = -0.81$ , SE = 0.13). Otherwise, all other  
381 parameter estimates for distance to town were positive. Overall, the RSF results supported the  
382 scale-independence of our SSF results regarding carnivore avoidance of areas near towns and  
383 areas with high trail density.

## 384 **Connectivity and habitat degradation**

385 Simulated paths under reference, current, and future land use scenarios had similar  
386 movement attributes compared observed paths (e.g., Figure 2, Figure 3). Both simulated and  
387 observed paths contained series of short steps with high turn angles interspersed with long  
388 distance movements with strong directional persistence. Under reference conditions, simulated  
389 paths were concentrated in the valley bottoms and used areas within the current footprint of  
390 towns. The combination of towns and rugged topography constrained the movements of both  
391 observed and simulated paths under current and future scenarios. This resulted in UDs with low  
392 frequencies of occurrence near towns and areas of high trail density and high UDs in more  
393 remote areas of the Bow Valley (Appendix S1: Figures S4 - S5).

394 Grizzly bear and wolf connectivity across digital transects on the north and south sides of  
395 Banff and Canmore ranged between 7 and 45% under current conditions with mean values of  
396 21% for grizzly bears and 25% for wolves (Figure 7). Grizzly bear and wolf connectivity further  
397 decreased from current to future conditions an average of 6% and 5% respectively (range = 0 to  
398 13%). Connectivity for grizzly bears and wolves was highest in the spring. Grizzly bear  
399 connectivity was lowest in the summer, whereas wolf connectivity was lowest in the fall and  
400 winter. Grizzly bear connectivity was on average higher along the northern transects compared to  
401 the southern transects. Wolf connectivity was highest on the northern side of Banff and lowest on  
402 the southern side of Canmore.

403 Grizzly bears and wolves UDs showed high intensity of use through the valley bottoms  
404 including areas near Banff and Canmore under reference conditions (Figure 2, Figure 3,  
405 Supplementary Figures S4 and S5). UDs under current and future conditions showed a  
406 cumulative decrease in use in and around the towns. The decrease in use near towns was offset

407 by increased use in more remote areas of the valley. The proportion of high quality habitat  
408 degraded due to anthropogenic development increased from current (mean = 0.145, range =  
409 0.088 to 0.183) to future conditions (mean = 0.164, range = 0.126 to 0.198; Figure 8). Habitat  
410 degradation was highest in summer and lowest in the spring and fall for grizzly bears. Habitat  
411 degradation was high for wolves in the summer, fall, and winter, and lowest in the spring.

412

## 413 **Discussion**

414 Our study used a combination of hidden Markov models and SSFs to estimate utilizations,  
415 connectivity, and changes in the amount of high quality due to current and future estimates of  
416 anthropogenic development. Our approach assessed the cumulative effects of multiple  
417 anthropogenic features on carnivore movements and connectivity around the towns of Banff and  
418 Canmore, Alberta, which averaged 23% relative to reference conditions. A scenario of future  
419 development and trail expansion would further reduce connectivity by an average of 5 to 6%. By  
420 using empirically-derived parameters in an individual-based simulation, our approach offers a  
421 tangible response variable for scientists to convey to land use decision makers. For example,  
422 rather than translating how ‘current density’ may change under different scenarios, we are able to  
423 estimate a percent change in the number of animals moving through a corridor under predicted  
424 land use scenarios.

425         The main advantages of our approach are as follows: 1) simulated movements directly  
426 from an SSF with multiple behavioural states helped create realistic movement paths where  
427 movement decisions were based on resource selection parameters; 2) our approach avoided  
428 transforming SSFs into resistance surfaces used for circuit-theory and cost-distance analyses,  
429 which have an weak theoretical link to movement ecology; and 3) estimates for changes in UDs

430 and connectivity have a simpler interpretation and a tighter link to movement probabilities  
431 compared to least-cost and circuit theory based estimates of connectivity. We chose to estimate  
432 connectivity by comparing transect crossing rates of simulated paths through narrow movement  
433 corridors, which in our study area are of conservation concern. Our approach could easily be  
434 expanded to examine the frequency with which paths travel between habitat patches (e.g. Suraci  
435 et al. 2020), between summer and winter ranges (Merkle et al. 2019), across highways with  
436 increased mortality risk (e.g. Quaglietta et al. 2019), or through other areas of conservation  
437 concern.

438 Our study supports the growing body of research showing that wildlife avoid some forms  
439 of human activity (e.g. Gaynor et al. 2018, Tucker et al. 2018, Nickel et al. 2020), which can lead  
440 to habitat fragmentation and reductions in connectivity (e.g. Bischof et al. 2017, Hilty et al.  
441 2020, Suraci et al. 2020). Given the global growth in human activity adjacent to protected areas  
442 (Wittemyer et al. 2008), and concurrent impacts of growing recreation in these landscapes  
443 (Gutzwiller et al. 2017), our approach and results emphasize the importance of cumulative  
444 effects assessment in regions surrounding parks and protected areas.

445 Numerous studies have found that grizzly bears (Chetkiewicz and Boyce 2009, Morales-  
446 González et al. 2020) and wolves (Hebblewhite and Merrill 2008, Rogala et al. 2011, Anton et  
447 al. 2020) avoid human activity, which can contribute to the fragmentation of populations  
448 (Proctor et al. 2012, Bischof et al. 2017). However, few studies have compared the behaviour of  
449 the two species. Wolves in our study exhibited stronger avoidance of towns, similar responses to  
450 trails, and weaker selection for the railway compared to grizzly bears. Grizzly bears and wolves  
451 had higher connectivity estimates in spring, which coincided with lower levels of human activity  
452 and a concentration of food resources and wolf movements to and from den sites in valley

453 bottoms. Interestingly, wolf connectivity estimates were slightly higher than grizzly bear  
454 connectivity estimates. One reason for this disconnect could be that wolves had faster speeds of  
455 travel, fewer steps were required to traverse corridors, and perhaps simulated steps could more  
456 easily jump across towns. Parameterizing models using path selection functions or collecting  
457 finer resolution GPS data could help reduce the probability of paths crossing inhospitable  
458 features. For instance, path selection functions can sometimes produced stronger regression  
459 coefficients and better connectivity models compared to SSFs (Zeller et al. 2015, Zeller et al.  
460 2018). Further, we did not assess how individual variability in animal responses to anthropogenic  
461 development affected connectivity (Muff et al. 2020). Simulating movements from random  
462 coefficients could highlight estimates of connectivity for both wary and habituated animals and  
463 could help identify areas likely to have high levels of human wildlife conflict (Buchholtz et al.  
464 2020, Lamb et al. 2020).

465         Two limitations of our study bear further consideration for similar work in the future.  
466 First, we lacked direct measurements of human activity on trail networks (Alberta Environment  
467 and Parks 2018). Because carnivores typically avoid encounters with people rather than linear  
468 features, our lack of high resolution trail use data likely reduced the effect size and precision of  
469 parameter estimates for trail density. Estimates of recreational activity could be improved by  
470 directly tracking individual movements (Heinemeyer et al. 2019), inferring activity from mobile  
471 device data (Corradini et al. 2021), or modelling spatial and temporal trends in trail use (Ladle et  
472 al. 2019). Better estimates of recreational activity would improve our understanding of how  
473 recreational activity affects wildlife movement and our ability to manage human-wildlife  
474 coexistence (Rogala et al. 2011, Naidoo and Burton 2020). Second, our data consisted of animal  
475 movements within established home ranges rather than dispersal or nomadic movements that are

476 important for landscape-scale connectivity (Fattebert et al. 2015). Other studies suggest animals  
477 select different resources and may have increased tolerance for human activity when dispersing  
478 when compared to movement within the home range. For instance, resistance models for Iberian  
479 lynx under-estimated connectivity when they were developed using GPS data from within home  
480 range movements (Blazquez-Cabrera et al. 2016). Further development and evaluation of  
481 connectivity models using dispersal data would be important when evaluating connectivity  
482 between isolated populations (Zeller et al. 2018).

483         Restoration actions, such as removal of human footprint, managing or consolidating  
484 recreational activity, and trail closures have potential to improve habitat quality and connectivity.  
485 Wildlife increased their use of corridors and degraded habitat following reductions in human  
486 activity, both in our ecosystem (Duke et al. 2001, Shepherd and Whittington 2006, Whittington  
487 et al. 2019) and around the world (Ngoprasert et al. 2017). For example, early work in our study  
488 area demonstrated positive wildlife connectivity consequences of removing recreational footprint  
489 in the Cascade wildlife corridor on the north side of the Banff town site (Duke et al. 2001), and  
490 positive effects of a temporal road closure on wildlife habitat quality (Whittington et al. 2019).  
491 Our approach for simulating animal movements and assessing connectivity could be applied to  
492 assess the effects of potential restoration actions on fine-scale connectivity (Wang et al. 2014,  
493 Mariela et al. 2020, Suraci et al. 2020). Simulations and restoration actions could focus on  
494 highway mitigations (Quaglietta et al. 2019), reductions in trail density, permanent closures,  
495 seasonal closures, or temporal closures (Whittington et al. 2019). In the face of global increases  
496 in human activity, especially surrounding parks and protected areas (Wittemyer et al. 2008),  
497 proactive habitat protection and restoration actions will be required to maintain habitat quality  
498 and connectivity for wide ranging wildlife (Hilty et al. 2020).

499

## 500 **Acknowledgements**

501 Parks Canada, the University of Montana, the University of Alberta, and Canadian Pacific  
502 Railway contributed to the collection of grizzly bear and wolf GPS data. MH acknowledges  
503 funding from NSF LTREB grant # 1556248. We thank J. Merkle for provided advice on step  
504 selection analyses and B. Hunt, A. Forshner, and S. Williams for their insights on earlier versions  
505 of the manuscript. Parks Canada provided financial support for data collection and analysis.

506

## 507 **Supporting Information**

508 Appendix S1. Maps of study area, observed GPS locations, and predicted utilization distributions  
509 from step selection function models.

510 Appendix S2: Tables of parameter estimates from movement models, step selection functions,  
511 and resource selection functions.

512

## 513 **Data availability**

514 We will submit GPS movement data, scripts to fit hidden Markov models, step selection  
515 functions, and simulations under current conditions to Data Dryad.

516

## 517 **Literature cited**

518 Abrahms, B., S. C. Sawyer, N. R. Jordan, J. W. McNutt, A. M. Wilson, and J. S. Brashares.  
519 2017. Does wildlife resource selection accurately inform corridor conservation? *Journal*  
520 *of Applied Ecology* **54**:412–422.

- 521 Alberta Environment and Parks. 2018. Human-wildlife coexistence: recommendations for  
522 improving human-wildlife coexistence in the Bow Valley.
- 523 Anton, C. B., D. W. Smith, J. P. Suraci, D. R. Stahler, T. P. Duane, and C. C. Wilmers. 2020.  
524 Gray wolf habitat use in response to visitor activity along roadways in Yellowstone  
525 National Park. *Ecosphere* **11**:e03164.
- 526 Avgar, T., S. R. Lele, J. L. Keim, and M. S. Boyce. 2017. Relative selection strength:  
527 quantifying effect size in habitat- and step-selection inference. *Ecology and Evolution*  
528 **7**:5322-5330.
- 529 Avgar, T., J. R. Potts, M. A. Lewis, and M. S. Boyce. 2016. Integrated step selection analysis:  
530 bridging the gap between resource selection and animal movement. *Methods in Ecology*  
531 *and Evolution* **7**:619-630.
- 532 Benz, R. A., M. S. Boyce, H. Thurfjell, D. G. Paton, M. Musiani, C. F. Dormann, and S. Ciuti.  
533 2016. Dispersal ecology informs design of large-scale wildlife corridors. *PLoS ONE*  
534 **11**:e0162989.
- 535 Bischof, R., S. M. J. G. Steyaert, and J. Kindberg. 2017. Caught in the mesh: roads and their  
536 network-scale impediment to animal movement. *Ecography* **40**:1369-1380.
- 537 Blazquez-Cabrera, S., A. Gastón, P. Beier, G. Garrote, M. Á. Simón, and S. Saura. 2016.  
538 Influence of separating home range and dispersal movements on characterizing corridors  
539 and effective distances. *Landscape Ecology* **31**:2355-2366.
- 540 Brennan, A., P. Beytell, O. Aschenborn, P. Du Preez, P. J. Funston, L. Hanssen, J. W. Kilian, G.  
541 Stuart-Hill, R. D. Taylor, and R. Naidoo. 2020. Characterizing multispecies connectivity  
542 across a transfrontier conservation landscape. *Journal of Applied Ecology* **57**:1700-1710.



- 543 Brooks, M. E., K. Kristensen, K. J. van Benthem, A. Magnusson, C. W. Berg, A. Nielsen, H. J.  
544 Skaug, M. Machler, and B. M. Bolker. 2017. glmmTMB balances speed and flexibility  
545 among packages for zero-inflated generalized linear mixed modeling. *The R journal*  
546 **9**:378-400.
- 547 Buchholtz, E. K., A. Stronza, A. Songhurst, G. McCulloch, and L. A. Fitzgerald. 2020. Using  
548 landscape connectivity to predict human-wildlife conflict. *Biological Conservation*  
549 **248**:108677.
- 550 Buderman, F. E., M. B. Hooten, J. S. Ivan, and T. M. Shenk. 2018. Large-scale movement  
551 behavior in a reintroduced predator population. *Ecography* **41**:126-139.
- 552 Calabrese, J. M., and W. F. Fagan. 2004. A comparison-shopper's guide to connectivity metrics.  
553 *Frontiers in Ecology and the Environment* **2**:529-536.
- 554 Chetkiewicz, C. L. B., and M. S. Boyce. 2009. Use of resource selection functions to identify  
555 conservation corridors. *Journal of Applied Ecology* **46**:1036-1047.
- 556 Corradini, A., M. Randles, L. Pedrotti, E. van Loon, G. Passoni, V. Oberosler, F. Rovero, C.  
557 Tattoni, M. Ciolli, and F. Cagnacci. 2021. Effects of cumulated outdoor activity on  
558 wildlife habitat use. *Biological Conservation* **253**:108818.
- 559 Duchesne, T., D. Fortin, and L.-P. Rivest. 2015. Equivalence between step selection functions  
560 and biased correlated random walks for statistical inference on animal movement. *PLoS*  
561 *ONE* **10**:e0122947.
- 562 Duke, D. L., M. Hebblewhite, P. C. Paquet, C. Callaghan, and M. Percy. 2001. Restoring a large  
563 carnivore corridor in Banff National Park. Pages 261-275 *in* D. Maehr, R. F. Noss, and J.  
564 Larkin, editors. *Large mammal restoration: ecological and social challenges in the 21st*  
565 *century*. Island Press, Washington, DC.

- 566 Fattebert, J., H. S. Robinson, G. Balme, R. Slotow, and L. Hunter. 2015. Structural habitat  
567 predicts functional dispersal habitat of a large carnivore: how leopards change spots.  
568 *Ecological Applications* **25**:1911-1921.
- 569 Ford, A. T., E. J. Sunter, C. Fauvelle, J. L. Bradshaw, B. Ford, J. Hutchen, N. Phillipow, and K.  
570 J. Teichman. 2020. Effective corridor width: linking the spatial ecology of wildlife with  
571 land use policy. *European Journal of Wildlife Research* **66**:69.
- 572 Fortin, D., H. L. Beyer, M. S. Boyce, D. W. Smith, T. Duchesne, and J. S. Mao. 2005. Wolves  
573 influence elk movements: behavior shapes a trophic cascade in Yellowstone National  
574 Park. *Ecology* **86**:1320-1330.
- 575 Fryxell, J. M., M. Hazell, L. Börger, B. D. Dalziel, D. T. Haydon, J. M. Morales, T. McIntosh,  
576 and R. C. Rosatte. 2008. Multiple movement modes by large herbivores at multiple  
577 spatiotemporal scales. *Proceedings of the National Academy of Sciences* **105**:19114-  
578 19119.
- 579 Fullman, T. J., R. R. Wilson, K. Joly, D. D. Gustine, P. Leonard, and W. M. Loya. 2021.  
580 Mapping potential effects of proposed roads on migratory connectivity for a highly  
581 mobile herbivore using circuit theory. *Ecological Applications* **31**:e2207.
- 582 Gaynor, K. M., C. E. Hojnowski, N. H. Carter, and J. S. Brashares. 2018. The influence of  
583 human disturbance on wildlife nocturnality. *Science* **360**:1232-1235.
- 584 Gutzwiller, K. J., A. L. D'Antonio, and C. A. Monz. 2017. Wildland recreation disturbance:  
585 broad-scale spatial analysis and management. *Frontiers in Ecology and the Environment*  
586 **15**:517-524.
- 587 Hebblewhite, M. 2005. Predation by wolves interacts with the North Pacific Oscillation (NPO)  
588 on a western North American elk population. *Journal of Animal Ecology* **74**:226-233.

- 589 Hebblewhite, M., and E. Merrill. 2008. Modelling wildlife–human relationships for social  
590 species with mixed-effects resource selection models. *Journal of Applied Ecology*  
591 **45**:834-844.
- 592 Hebblewhite, M., and E. H. Merrill. 2011. Demographic balancing of migrant and resident elk in  
593 a partially migratory population through forage-predation tradeoffs. *Oikos* **120**:1860-  
594 1870.
- 595 Hebblewhite, M., M. Percy, and E. H. Merrill. 2007. Are all global positioning system collars  
596 created equal? Correcting habitat-induced bias using three brands in the Central Canadian  
597 Rockies. *Journal of Wildlife Management* **71**:2026–2033.
- 598 Hebblewhite, M., C. A. White, C. Nietvelt, J. M. McKenzie, T. E. Hurd, J. M. Fryxell, J. M.  
599 Bayley, and P. C. Paquet. 2005. Human activity mediates a trophic cascade caused by  
600 wolves. *Ecology* **76**:2135-2144.
- 601 Heinemeyer, K., J. Squires, M. Hebblewhite, J. J. O'Keefe, J. D. Holbrook, and J. Copeland.  
602 2019. Wolverines in winter: indirect habitat loss and functional responses to backcountry  
603 recreation. *Ecosphere* **10**:e02611.
- 604 Hilty, J., G. Worboys, A. Keeley, S. Woodley, B. Lausche, H. Locke, M. Carr, I. Pulsford, J.  
605 Pittock, and J. W. White. 2020. Guidelines for conserving connectivity through  
606 ecological networks and corridors. Gland, Switzerland: IUCN-WCPA.
- 607 Hooten, M. B., X. Lu, M. J. Garlick, and J. A. Powell. 2020. Animal movement models with  
608 mechanistic selection functions. *Spatial Statistics* **37**:100406.
- 609 Jayadevan, A., R. Nayak, K. K. Karanth, J. Krishnaswamy, R. DeFries, K. U. Karanth, and S.  
610 Vaidyanathan. 2020. Navigating paved paradise: Evaluating landscape permeability to

- 611 movement for large mammals in two conservation priority landscapes in India. *Biological*  
612 *Conservation* **247**:108613.
- 613 Ladle, A., T. Avgar, M. Wheatley, G. B. Stenhouse, S. E. Nielsen, and M. S. Boyce. 2019.  
614 Grizzly bear response to spatio-temporal variability in human recreational activity.  
615 *Journal of Applied Ecology* **56**:375-386.
- 616 Lamb, C. T., A. T. Ford, B. N. McLellan, M. F. Proctor, G. Mowat, L. Ciarniello, S. E. Nielsen,  
617 and S. Boutin. 2020. The ecology of human–carnivore coexistence. *Proceedings of the*  
618 *National Academy of Sciences*:201922097.
- 619 Langemann, E. G. 2011. Archaeology in the Rocky Mountain National Parks: uncovering an  
620 11,000-year-long story. *A Century of Parks Canada, 1911-2011*:303-332.
- 621 Mahoney, P. J., G. E. Liston, S. LaPoint, E. Gurarie, B. Mangipane, A. G. Wells, T. J. Brinkman,  
622 J. U. H. Eitel, M. Hebblewhite, A. W. Nolin, N. Boelman, and L. R. Prugh. 2018.  
623 Navigating snowscapes: scale-dependent responses of mountain sheep to snowpack  
624 properties. *Ecological Applications* **28**:1715-1729.
- 625 Mariela, G., C. Laura, and J. L. Belant. 2020. Planning for carnivore recolonization by mapping  
626 sex-specific landscape connectivity. *Global Ecology and Conservation* **21**:e00869.
- 627 Marrotte, R. R., J. Bowman, M. G. C. Brown, C. Cordes, K. Y. Morris, M. B. Prentice, and P. J.  
628 Wilson. 2017. Multi-species genetic connectivity in a terrestrial habitat network.  
629 *Movement Ecology* **5**:21.
- 630 Merkle, J. A., H. Sawyer, K. L. Monteith, S. P. H. Dwinnell, G. L. Fralick, and M. J. Kauffman.  
631 2019. Spatial memory shapes migration and its benefits: evidence from a large herbivore.  
632 *Ecology Letters* **22**:1797-1805.

- 633 Meurant, M., A. Gonzalez, A. Doxa, and C. H. Albert. 2018. Selecting surrogate species for  
634 connectivity conservation. *Biological Conservation* **227**:326-334.
- 635 Michelot, T., R. Langrock, and T. A. Patterson. 2016. moveHMM: an R package for the  
636 statistical modelling of animal movement data using hidden Markov models. *Methods in*  
637 *Ecology and Evolution* **7**:1308-1315.
- 638 Morales-González, A., H. Ruiz-Villar, A. Ordiz, and V. Penteriani. 2020. Large carnivores living  
639 alongside humans: Brown bears in human-modified landscapes. *Global Ecology and*  
640 *Conservation* **22**:e00937.
- 641 Muff, S., J. Signer, and J. Fieberg. 2020. Accounting for individual-specific variation in habitat-  
642 selection studies: Efficient estimation of mixed-effects models using Bayesian or  
643 frequentist computation. *Journal of Animal Ecology* **89**:80-92.
- 644 Naidoo, R., and A. C. Burton. 2020. Relative effects of recreational activities on a temperate  
645 terrestrial wildlife assemblage. *Conservation Science and Practice* **2**:e271.
- 646 Ngoprasert, D., A. J. Lynam, and G. A. Gale. 2017. Effects of temporary closure of a national  
647 park on leopard movement and behaviour in tropical Asia. *Mammalian Biology* **82**:65-  
648 73.
- 649 Nickel, B. A., J. P. Suraci, M. L. Allen, and C. C. Wilmers. 2020. Human presence and human  
650 footprint have non-equivalent effects on wildlife spatiotemporal habitat use. *Biological*  
651 *Conservation* **241**:108383.
- 652 Nielsen, S. E., G. B. Stenhouse, and M. S. Boyce. 2006. A habitat-based framework for grizzly  
653 bear conservation in Alberta. *Biological Conservation* **130**:217-229.

- 654 Palmer, S. C. F., A. Coulon, and J. M. J. Travis. 2011. Introducing a ‘stochastic movement  
655 simulator’ for estimating habitat connectivity. *Methods in Ecology and Evolution* **2**:258-  
656 268.
- 657 Panzacchi, M., B. Van Moorter, O. Strand, M. Scaerens, I. Kivimäki, C. C. St. Clair, I. Herfindal,  
658 and L. Boitani. 2016. Predicting the continuum between corridors and barriers to animal  
659 movements using step selection functions and randomized shortest paths. *Journal of*  
660 *Animal Ecology* **85**:32-42.
- 661 Proctor, M. F., D. Paetkau, B. N. McLellan, G. B. Stenhouse, K. C. Kendall, R. D. Mace, W. F.  
662 Kasworm, C. Servheen, C. L. Lausen, M. L. Gibeau, W. L. Wakkinen, M. A. Haroldson,  
663 G. Mowat, C. D. Apps, L. M. Ciarniello, R. M. R. Barclay, M. S. Boyce, C. C. Schwartz,  
664 and C. Strobeck. 2012. Population fragmentation and inter-ecosystem movements of  
665 grizzly bears in western Canada and the northern United States. *Wildlife Monographs*  
666 **180**:1-46.
- 667 Quaglietta, L., and M. Porto. 2019. SiMRiv: an R package for mechanistic simulation of  
668 individual, spatially-explicit multistate movements in rivers, heterogeneous and  
669 homogeneous spaces incorporating landscape bias. *Movement Ecology* **7**:11.
- 670 Quaglietta, L., M. Porto, and A. T. Ford. 2019. Simulating animal movements to predict wildlife-  
671 vehicle collisions: illustrating an application of the novel R package SiMRiv. *European*  
672 *Journal of Wildlife Research* **65**:100.
- 673 QuantumPlace Developments Ltd. 2020a. Smith Creek area structure plan, July 2020.
- 674 QuantumPlace Developments Ltd. 2020b. Three Sisters area structure plan, July 2020.
- 675 Ray, J., K. H. Redford, R. Steneck, and J. Berger. 2013. Large carnivores and the conservation of  
676 biodiversity. Island Press.

- 677 Ripple, W. J., J. A. Estes, R. L. Beschta, C. C. Wilmers, E. G. Ritchie, M. Hebblewhite, J.  
678 Berger, B. Elmhagen, M. Letnic, M. P. Nelson, O. J. Schmitz, D. W. Smith, A. D.  
679 Wallach, and A. J. Wirsing. 2014. Status and ecological effects of the world's largest  
680 carnivores. *Science* **343**.
- 681 Roever, C. L., H. L. Beyer, M. J. Chase, and R. J. van Aarde. 2014. The pitfalls of ignoring  
682 behaviour when quantifying habitat selection. *Diversity and Distributions* **20**:322-333.
- 683 Rogala, J. T., M. Hebblewhite, J. Whittington, C. A. White, J. Coleshill, and M. Musiani. 2011.  
684 Human activity differentially redistributes large mammals in the Canadian Rockies  
685 National Parks. *Ecology and Society* **16**:16.
- 686 Shepherd, B., and J. Whittington. 2006. Response of wolves in winter to wildlife corridor  
687 restoration and human use management. *Ecology and Society* **11**:1.
- 688 Signer, J., J. Fieberg, and T. Avgar. 2017. Estimating utilization distributions from fitted step-  
689 selection functions. *Ecosphere* **8**:e01771.
- 690 Signer, J., J. Fieberg, and T. Avgar. 2019. Animal movement tools (amt): R package for  
691 managing tracking data and conducting habitat selection analyses. *Ecology and Evolution*  
692 **9**:880-890.
- 693 Suraci, J. P., L. G. Frank, A. Oriol-Cotterill, S. Ekwanga, T. M. Williams, and C. C. Wilmers.  
694 2019. Behavior-specific habitat selection by African lions may promote their persistence  
695 in a human-dominated landscape. *Ecology* **100**:e02644.
- 696 Suraci, J. P., B. A. Nickel, and C. C. Wilmers. 2020. Fine-scale movement decisions by a large  
697 carnivore inform conservation planning in human-dominated landscapes. *Landscape*  
698 *Ecology* **35**:1635–1649.

- 699 Terborgh, J., J. A. Estes, P. Paquet, K. Ralls, D. Boyd-Herger, B. J. Miller, and R. F. Noss. 1999.  
700 The role of top carnivores in regulating terrestrial ecosystems. Pages 39-64 *in* M. E.  
701 Soulé and J. Terborgh, editors. *Continental Conservation: Scientific Foundations of*  
702 *Regional Reserve Networks*. The Wildlands Project. Island Pres, Washington, D.C.
- 703 Tucker, M. A., K. Böhning-Gaese, W. F. Fagan, J. M. Fryxell, B. Van Moorter, S. C. Alberts, A.  
704 H. Ali, A. M. Allen, N. Attias, T. Avgar, H. Bartlam-Brooks, B. Bayarbaatar, J. L.  
705 Belant, A. Bertassoni, D. Beyer, L. Bidner, F. M. van Beest, S. Blake, N. Blaum, C.  
706 Bracis, D. Brown, P. J. N. de Bruyn, F. Cagnacci, J. M. Calabrese, C. Camilo-Alves, S.  
707 Chamailé-Jammes, A. Chiaradia, S. C. Davidson, T. Dennis, S. DeStefano, D.  
708 Diefenbach, I. Douglas-Hamilton, J. Fennessy, C. Fichtel, W. Fiedler, C. Fischer, I.  
709 Fischhoff, C. H. Fleming, A. T. Ford, S. A. Fritz, B. Gehr, J. R. Goheen, E. Gurarie, M.  
710 Hebblewhite, M. Heurich, A. J. M. Hewison, C. Hof, E. Hurme, L. A. Isbell, R. Janssen,  
711 F. Jeltsch, P. Kaczensky, A. Kane, P. M. Kappeler, M. Kauffman, R. Kays, D. Kimuyu,  
712 F. Koch, B. Kranstauber, S. LaPoint, P. Leimgruber, J. D. C. Linnell, P. López-López, A.  
713 C. Markham, J. Mattisson, E. P. Medici, U. Mellone, E. Merrill, G. de Miranda Mourão,  
714 R. G. Morato, N. Morellet, T. A. Morrison, S. L. Díaz-Muñoz, A. Mysterud, D.  
715 Nandintsetseg, R. Nathan, A. Niamir, J. Odden, R. B. O'Hara, L. G. R. Oliveira-Santos,  
716 K. A. Olson, B. D. Patterson, R. Cunha de Paula, L. Pedrotti, B. Reineking, M. Rimmler,  
717 T. L. Rogers, C. M. Rolandsen, C. S. Rosenberry, D. I. Rubenstein, K. Safi, S. Saïd, N.  
718 Sapir, H. Sawyer, N. M. Schmidt, N. Selva, A. Sergiel, E. Shiilegdamba, J. P. Silva, N.  
719 Singh, E. J. Solberg, O. Spiegel, O. Strand, S. Sundaresan, W. Ullmann, U. Voigt, J.  
720 Wall, D. Wattles, M. Wikelski, C. C. Wilmers, J. W. Wilson, G. Wittemyer, F. Zięba, T.



- 721           Zwijacz-Kozica, and T. Mueller. 2018. Moving in the Anthropocene: Global reductions  
722           in terrestrial mammalian movements. *Science* **359**:466-469.
- 723   Wang, F., W. J. McShea, D. Wang, S. Li, Q. Zhao, H. Wang, and Z. Lu. 2014. Evaluating  
724           landscape options for corridor restoration between giant panda reserves. *PLoS ONE*  
725           **9**:e105086.
- 726   Whittington, J., P. Low, and B. Hunt. 2019. Temporal road closures improve habitat quality for  
727           wildlife. *Scientific reports* **9**:3772.
- 728   Whittington, J., C. C. St. Clair, and G. Mercer. 2005. Spatial responses of wolves to roads and  
729           trails in mountain valleys. *Ecological Applications* **15**:543-553.
- 730   Wittemyer, G., P. Elsen, W. T. Bean, A. C. O. Burton, and J. S. Brashares. 2008. Accelerated  
731           human population growth at protected area edges. *Science* **321**:123-126.
- 732   Zeller, K., K. McGarigal, S. Cushman, P. Beier, T. W. Vickers, and W. Boyce. 2015. Using step  
733           and path selection functions for estimating resistance to movement: pumas as a case  
734           study. *Landscape Ecology*:1-17.
- 735   Zeller, K. A., M. K. Jennings, T. W. Vickers, H. B. Ernest, S. A. Cushman, and W. M. Boyce.  
736           2018. Are all data types and connectivity models created equal? Validating common  
737           connectivity approaches with dispersal data. *Diversity and Distributions* **24**:868-879.
- 738   Zeller, K. A., D. W. Wattles, J. M. Bauder, and S. DeStefano. 2020. Forecasting seasonal habitat  
739           connectivity in a developing landscape. *Land* **9**:233.
- 740   Zeller, K. A., D. W. Wattles, L. Conlee, and S. DeStefano. 2019. Black bears alter movements in  
741           response to anthropogenic features with time of day and season. *Movement Ecology*  
742           **7**:19.

743 Zhai, Y., P. Korça Baran, and C. Wu. 2018. Can trail spatial attributes predict trail use level in  
744 urban forest park? An examination integrating GPS data and space syntax theory. *Urban*  
745 *Forestry & Urban Greening* **29**:171-182.  
746

## 747 **List of Figures**

748 Figure 1. Workflow to assess connectivity and change in habitat quality using hidden Markov  
749 models, SSFs, and RSFs. We classified movement behaviors into slow and fast states and then  
750 used those states in SSF models and in path simulations. Simulated points can be used to  
751 estimate UDs and changes in habitat quality. Connectivity can be measured by comparing  
752 movement rates through corridors, across transects, or between patches relative to a reference  
753 model of movement with no anthropogenic development.

754

755 Figure 2. Illustration of our connectivity modeling approach in Figure 1 for one species (wolf)  
756 and one season (summer) showing the distribution of observed wolf paths around the town of  
757 Banff, a random sample of simulated paths under three land use scenarios, and expected  
758 utilization distribution. We used hidden Markov models and SSFs to simulate 200,000  
759 movement paths across a two-month window. We tallied the number of paths that crossed the  
760 valley wide transect and calculated connectivity as the ratio of current to reference and future to  
761 reference crossing frequencies. We further quantified habitat degradation as changes in the area  
762 of high quality habitat relative to reference conditions.

763

764 Figure 3. Illustration of our connectivity modeling approach in Figure 1 for one species (wolf)  
765 and one season (summer) showing the distribution of observed wolf paths around the town of  
766 Canmore, a random sample of simulated paths under three land use scenarios, and expected  
767 utilization distribution.

768

769 Figure 4. Grizzly bear and wolf movement state probabilities (slow versus fast movements) and  
770 95% CI's depended on time of day. Movement states were predicted from hidden Markov  
771 models developed from GPS locations. Slow and fast states are interpreted to represent feeding-  
772 resting and travel behaviours, respectively.

773

774 Figure 5. Human use related parameter estimates and 95% CI's from grizzly bear and wolf SSF  
775 and RSF models. We created separate models for each species and season. Positive values reflect  
776 selection for high values of the covariate.

777

778 Figure 6. Grizzly bear and wolf relative selection strength and 95% CI's as a function of distance  
779 to town and trail density during summer. We calculated relative selection strength by creating  
780 predictions from SSFs while holding all variables constant at their mean except for distance to  
781 town, trail density, time of day (Day = 1200 hours, Night = 2400 hours), and distance to paved  
782 road (Near = 0 km and Far = 20 km).

783

784 Figure 7. Connectivity estimates for grizzly bears and wolves around the towns of Banff and  
785 Canmore under current and future footprints of anthropogenic development. We estimated  
786 connectivity by comparing the number of simulated paths that crossed transects under current  
787 and future conditions to crossing rates from reference conditions. We simulated 200,000 paths  
788 for each species, season, and time period. On average, connectivity decreased from Current to  
789 Future for grizzly bears by 6.5%, and, wolves by 5.1%. Grizzly bears have no connectivity  
790 estimates while they hibernation in winter.

791

792 Figure 8. Habitat degradation measured as the decrease in proportion of high quality habitat from  
793 reference to current and future time periods. We estimated habitat degradation for the Bow  
794 Valley between Banff and Canmore, Alberta, Canada  
795

796

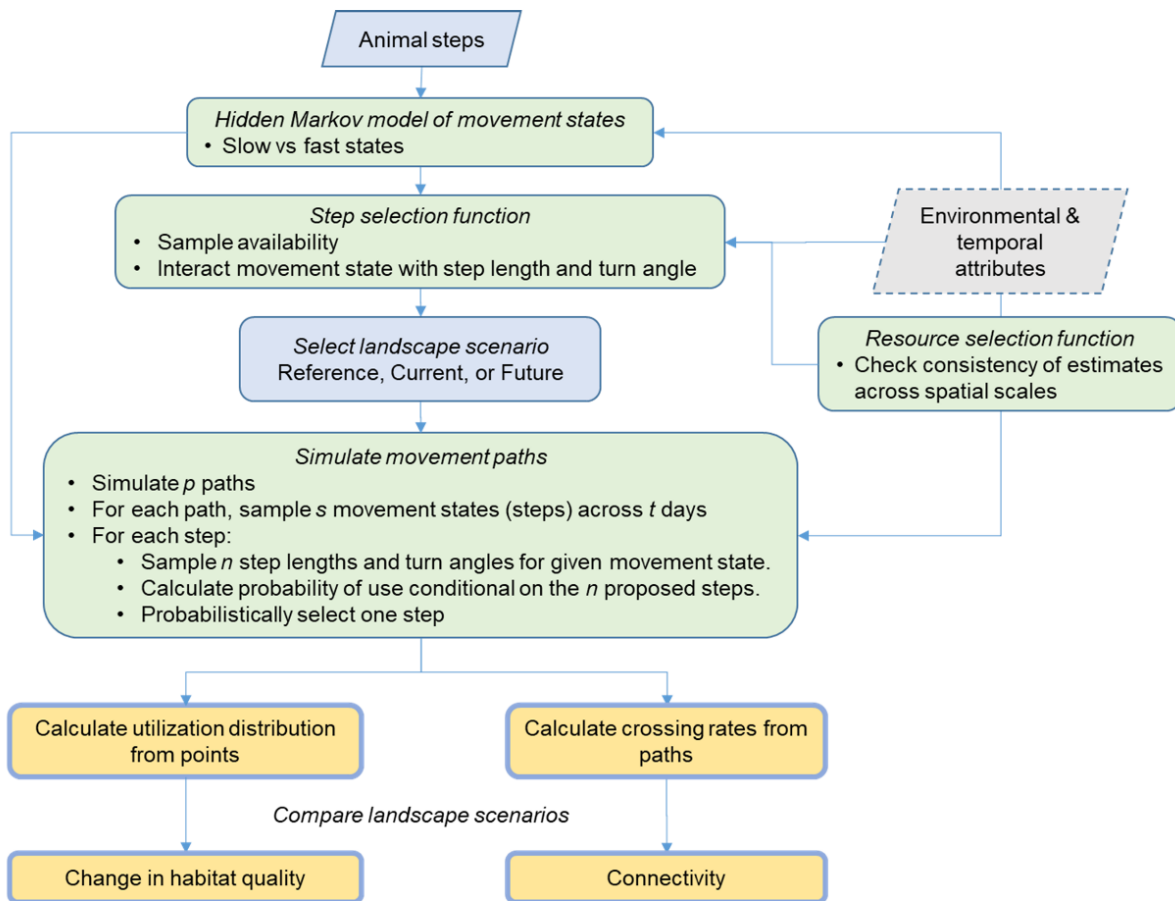

797

798 Figure 1. Workflow to assess connectivity and change in habitat quality using hidden Markov

799 models, SSFs, and RSFs. We classified movement behaviors into slow and fast states and then

800 used those states in SSF models and in path simulations. Simulated points can be used to

801 estimate UDs and changes in habitat quality. Connectivity can be measured by comparing

802 movement rates through corridors, across transects, or between patches relative to a reference

803 model of movement with no anthropogenic development.



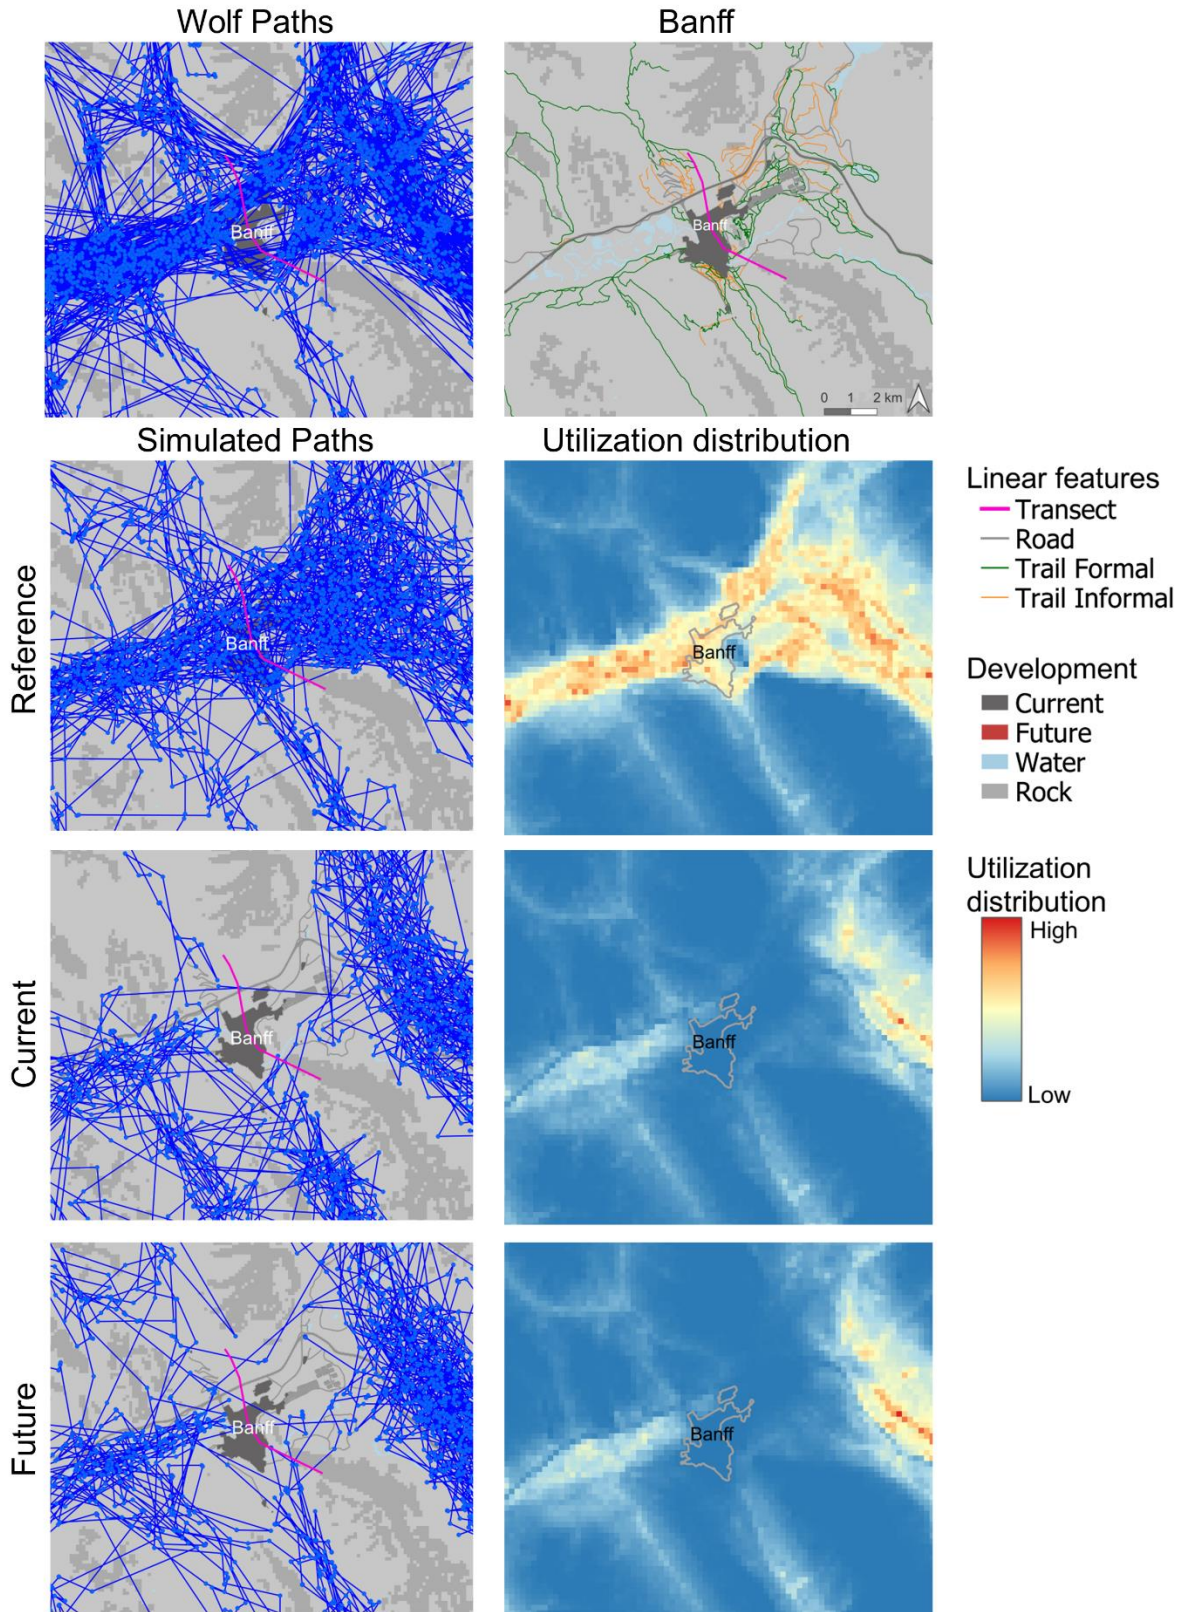

805 Figure 2. Illustration of our connectivity modeling approach in Figure 1 for one species (wolf)  
806 and one season (summer) showing the distribution of observed wolf paths around the town of  
807 Banff, a random sample of simulated paths under three land use scenarios, and expected  
808 utilization distribution. We used hidden Markov models and SSFs to simulate 200,000  
809 movement paths across a two-month window. We tallied the number of paths that crossed the  
810 valley wide transect and calculated connectivity as the ratio of current to reference and future to  
811 reference crossing frequencies. We further quantified habitat degradation as changes in the area  
812 of high quality habitat relative to reference conditions.



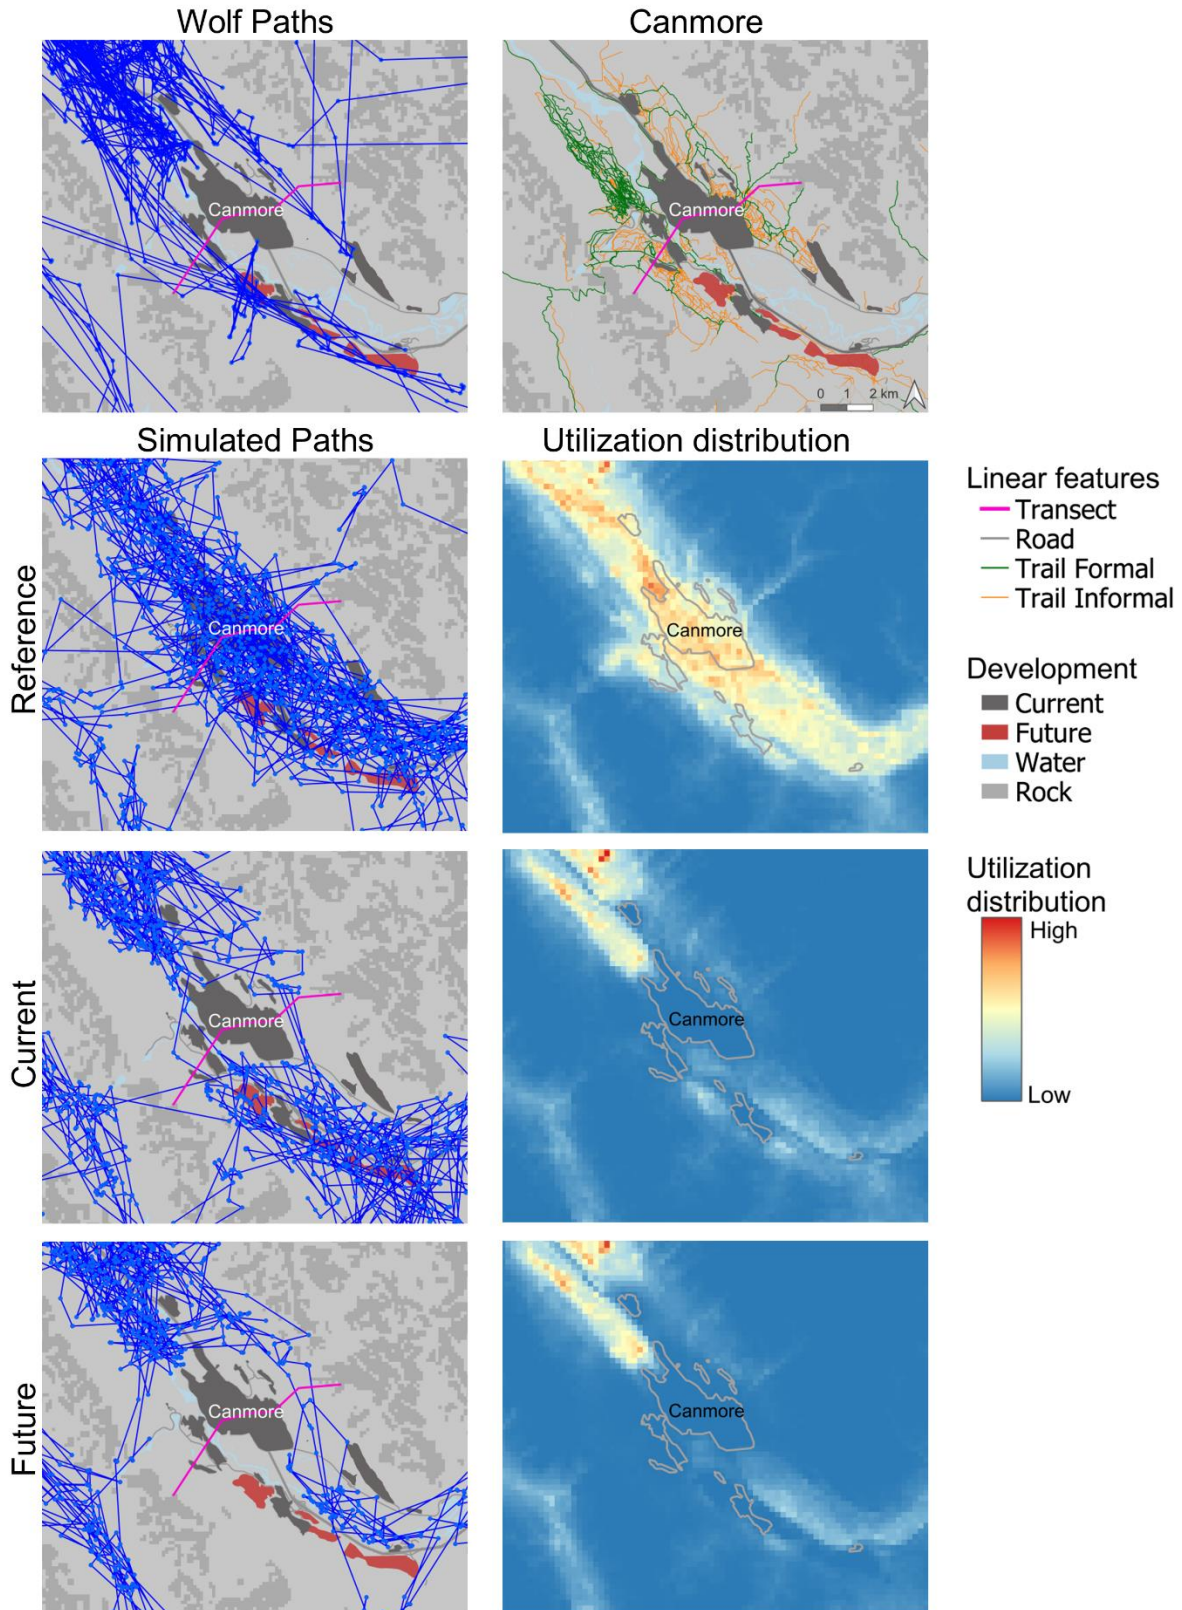

813

814 Figure 3. Illustration of our connectivity modeling approach in Figure 1 for one species (wolf)  
815 and one season (summer) showing the distribution of observed wolf paths around the town of  
816 Canmore, a random sample of simulated paths under three land use scenarios, and expected  
817 utilization distribution.

818

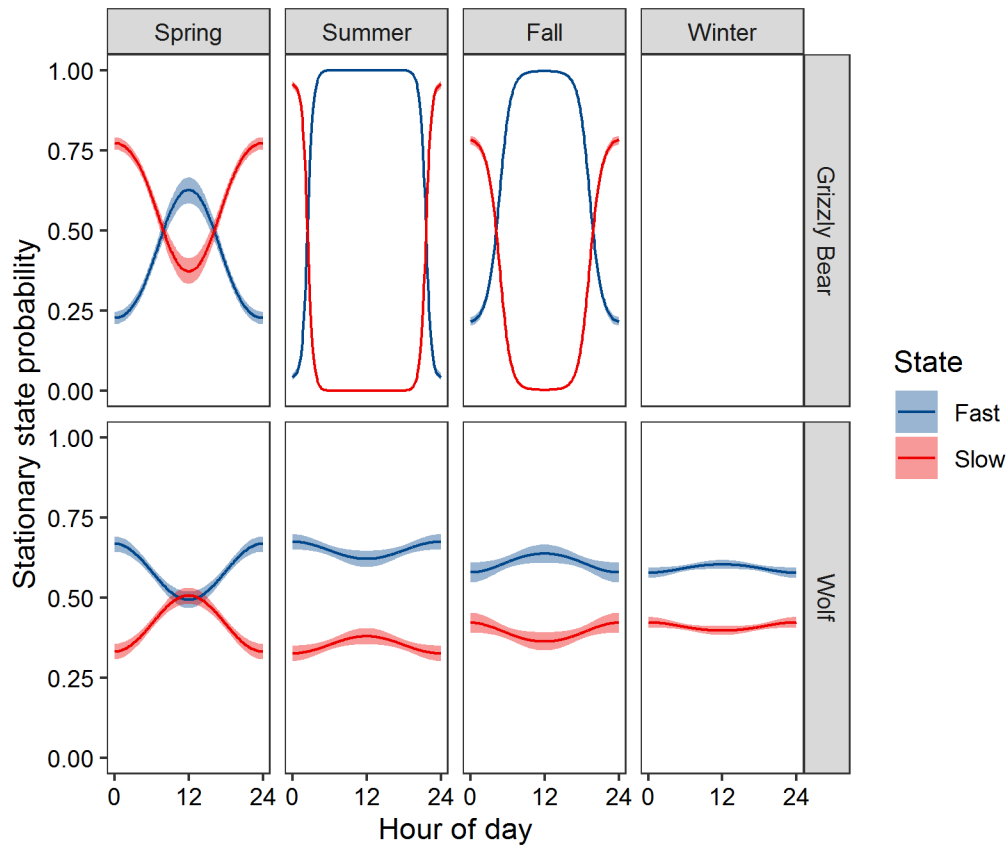

819

820 Figure 4. Grizzly bear and wolf movement state probabilities (slow versus fast movements) and  
821 95% CI's depended on time of day. Movement states were predicted from hidden Markov  
822 models developed from GPS locations. Slow and fast states are interpreted to represent feeding-  
823 resting and travel behaviours, respectively.

824

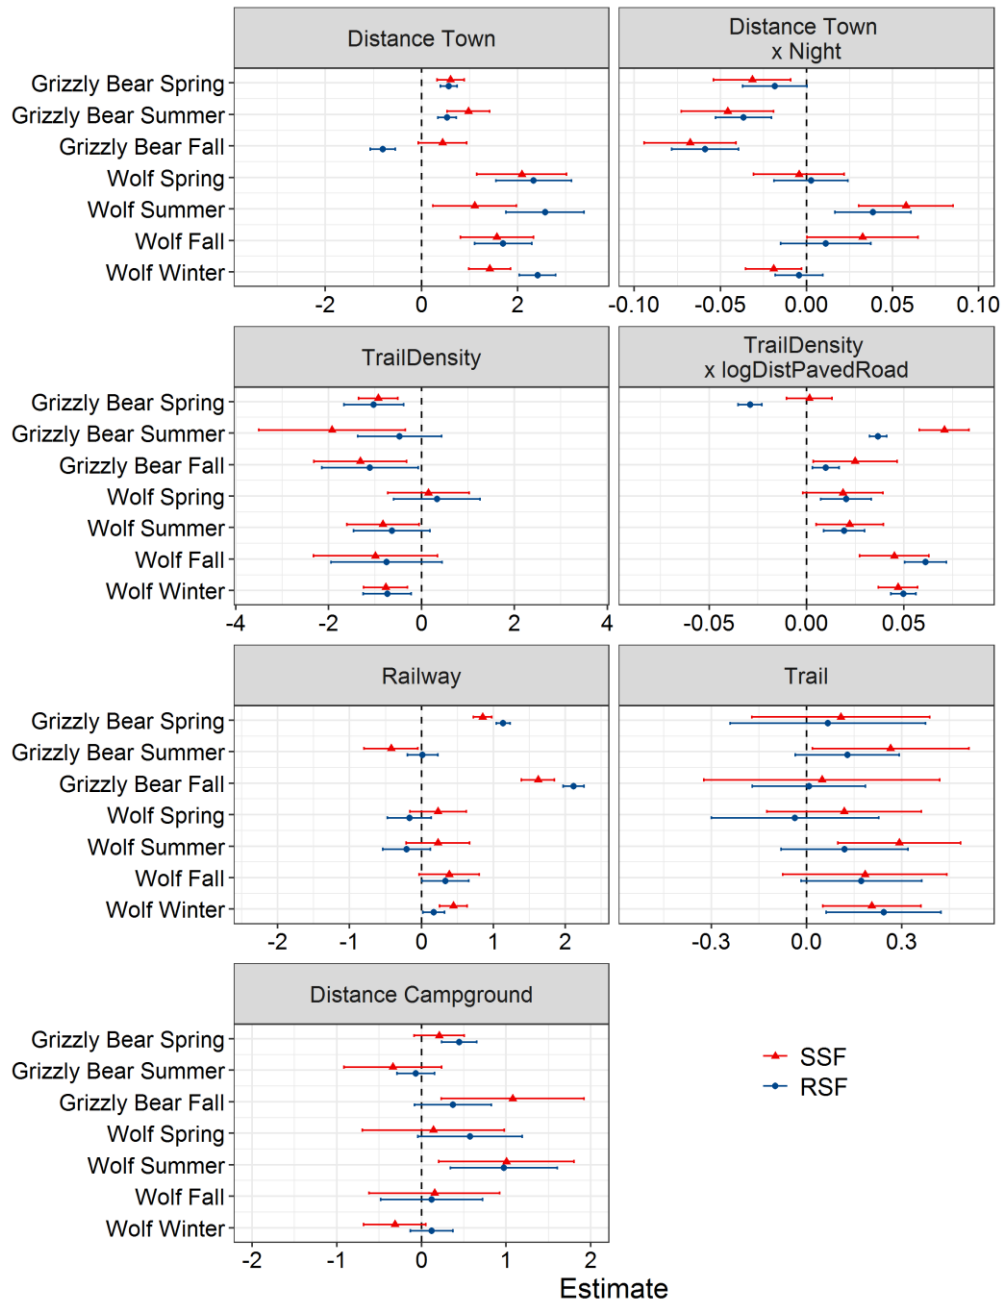

825

826 Figure 5. Human use related parameter estimates and 95% CI's from grizzly bear and wolf SSF  
827 and RSF models. We created separate models for each species and season. Positive values reflect  
828 selection for high values of the covariate.

829

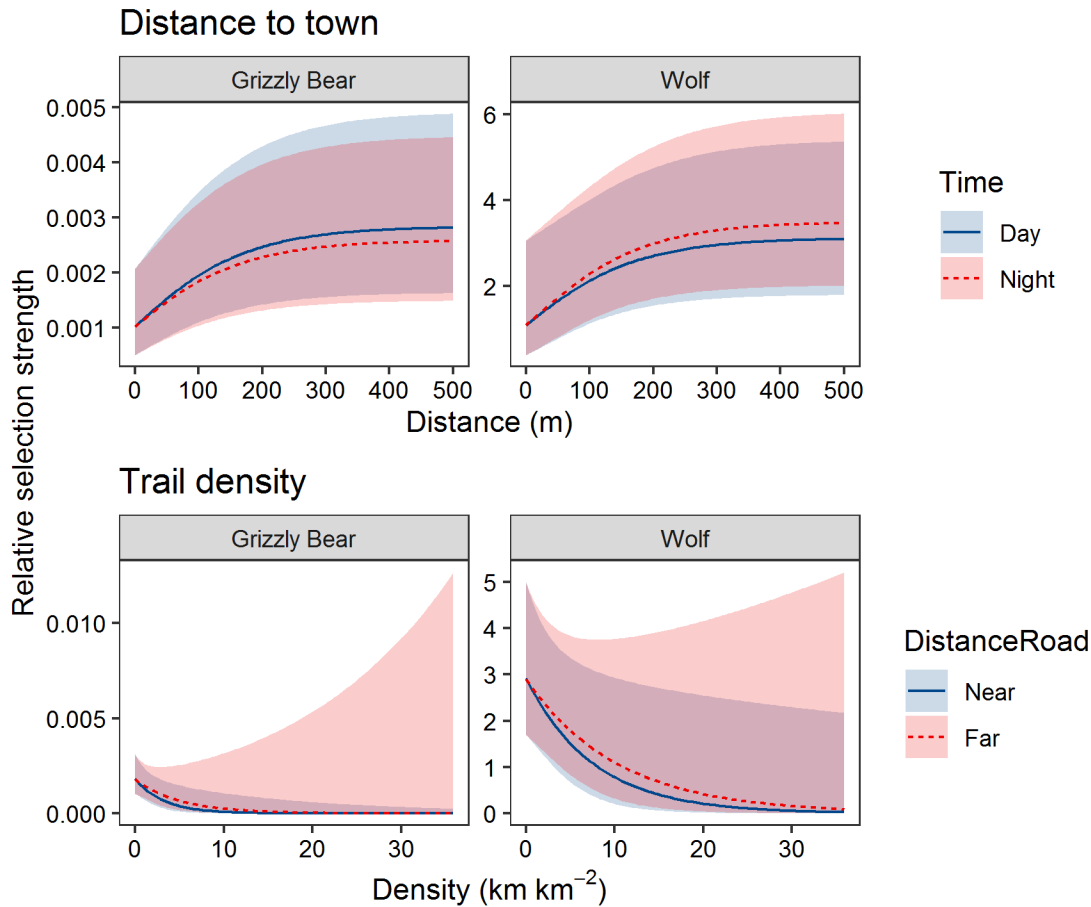

830

831 Figure 6. Grizzly bear and wolf relative selection strength and 95% CI's as a function of distance  
832 to town and trail density during summer. We calculated relative selection strength by creating  
833 predictions from SSFs while holding all variables constant at their mean except for distance to  
834 town, trail density, time of day (Day = 1200 hours, Night = 2400 hours), and distance to paved  
835 road (Near = 0 km and Far = 20 km).

836

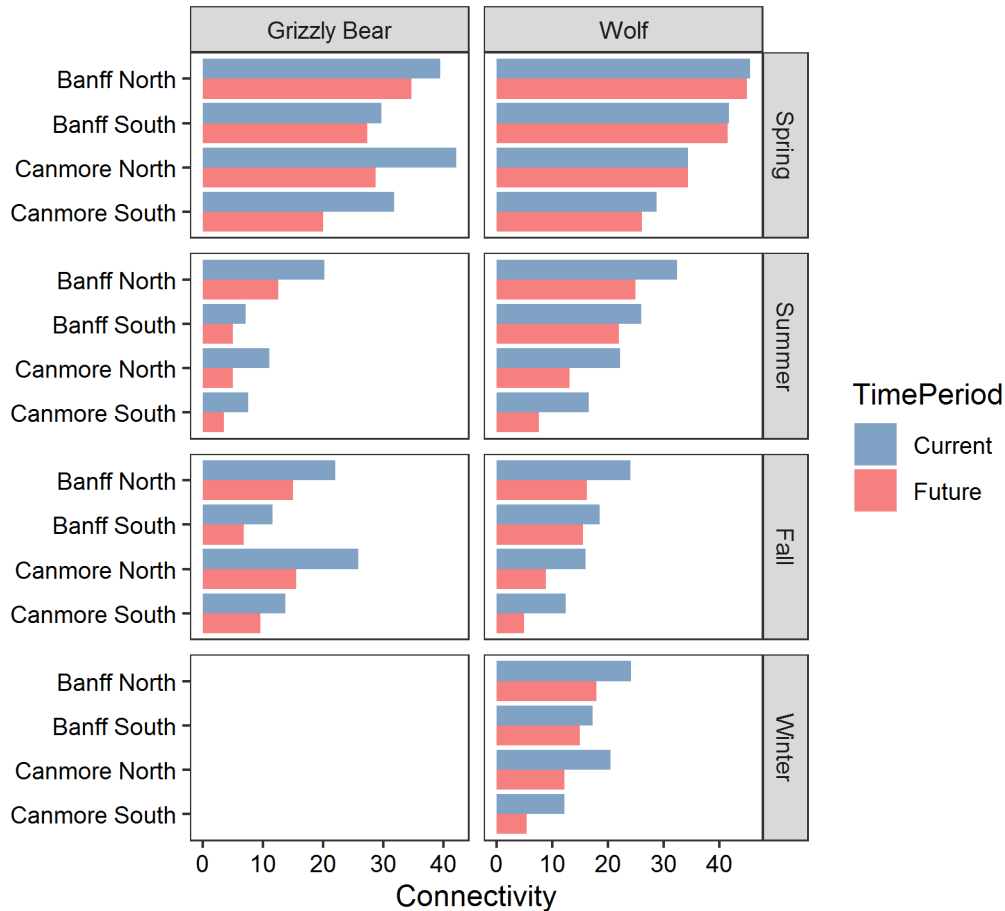

837

838 Figure 7. Connectivity estimates for grizzly bears and wolves around the towns of Banff and  
 839 Canmore under current and future footprints of anthropogenic development. We estimated  
 840 connectivity by comparing the number of simulated paths that crossed transects under current  
 841 and future conditions to crossing rates from reference conditions. We simulated 200,000 paths  
 842 for each species, season, and time period. On average, connectivity decreased from Current to  
 843 Future for grizzly bears by 6.5%, and, wolves by 5.1%. Grizzly bears have no connectivity  
 844 estimates while they hibernation in winter.

845

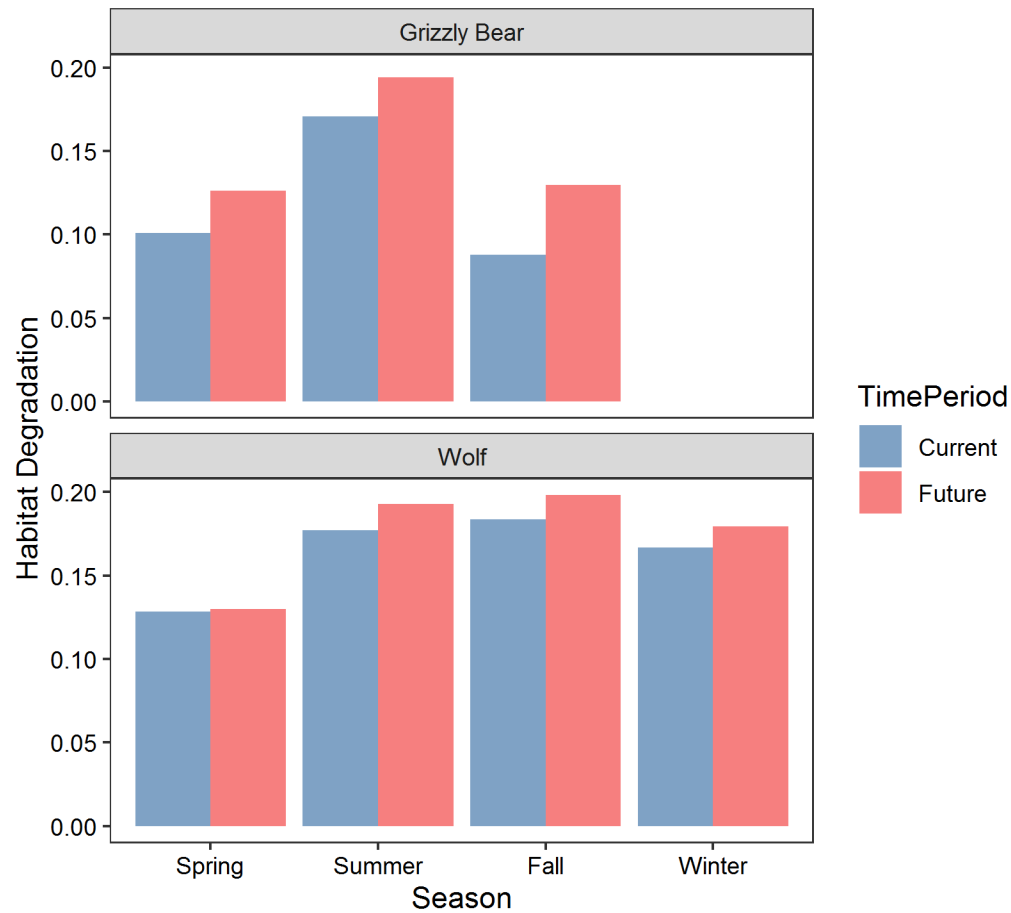

846

847 Figure 8. Habitat degradation measured as the decrease in proportion of high quality habitat from  
848 reference to current and future time periods. We estimated habitat degradation for the Bow  
849 Valley between Banff and Canmore, Alberta, Canada.

850
